# Supplementary material
Source: publisher figshare collection journal article supplement (https://brill.figshare.com/articles/dataset/_/28150925)
Supplement: Supplementary file 1 [file 1]

## Sheet: nema abundance and soil data
	Supplementary Table S1.		Nematode abundance data and indices
			Taxa abbreviations see Fig. 5).
Sites	Soil type	pH	EC	OC	Available N	Na	Ca	Mg	Crop history previous year	Na absorption ratio	Cep	Ple	Dor	Qud	Pra	Rhabdo	Mon	Myl	Act	Dip	Mer	Hop	Aph	Monhy	Achro	Tylen	Ala	Het	Tylencho	PriS	Rhab	Apor	Tri
1	Non-saline	5.36	0.1	0.06	142	75	1550	1020	rice+fallow	3.8	60	20	0	20	40	0	0	0	0	20	0	0	0	0	0	0	0	0	0	0	80	0	0
2	Non-saline	5.82	0.1	0.24	128	50	800	60	rice+black gram+fallow	7.4	990	450	630	540	270	900	270	0	0	0	1080	90	0	0	90	540	0	0	0	0	360	0	0
3	Non-saline	5.74	0.12	0.75	346	80	3400	540	rice+green gram+fallow	5	900	360	360	540	0	630	0	0	0	0	1170	0	180	0	0	0	630	0	0	0	180	0	86
4	Non-saline	6.6	0.13	0.09	112	45	1600	300	rice+black gram+fallow	4.9	60	240	0	120	180	0	0	0	0	0	0	60	0	0	0	0	0	0	0	0	180	0	0
5	Non-saline	5.55	0.14	0.33	224	80	2350	360	rice+fallow	4.2	602	172	430	430	344	0	258	0	0	86	172	0	0	0	0	0	0	0	0	0	344	0	0
6	Non-saline	6.35	0.16	0.33	294	105	2850	870	rice+black gram+fallow	3.9	92	138	322	92	0	368	184	0	0	0	0	0	0	0	0	46	0	0	0	0	0	0	0
7	Non-saline	6.61	0.18	0.54	204	80	2800	600	rice+black gram+fallow	4.4	0	0	80	0	0	0	40	0	0	0	200	0	0	0	0	40	0	0	0	0	0	0	0
8	Non-saline	5.88	0.19	0.18	152	80	2650	480	rice+fallow+sesamum	8.1	250	100	350	150	150	150	50	0	0	50	300	200	0	0	0	50	0	0	0	0	50	0	0
9	Non-saline	6.38	0.21	0.36	244	80	2000	330	rice+black gram+fallow	4	160	120	160	120	120	240	80	0	0	0	120	0	0	0	0	0	0	80	0	0	120	0	0
10	Non-saline	5.76	0.28	0.12	306	105	6050	1440	rice+green gram+fallow	6.1	120	40	120	80	40	0	0	0	0	40	200	0	0	0	0	40	0	0	40	0	80	0	0
11	Non-saline	5.26	0.29	0.45	262	195	4600	30	rice+black gram+fallow	7.8	252	138	84	84	210	0	0	42	0	0	0	84	0	0	0	84	42	42	0	0	0	0	0
12	Non-saline	7.19	0.3	0.51	268	310	11550	420	rice+black gram+fallow	6.8	600	480	0	40	200	440	80	120	0	0	40	0	80	0	0	0	0	0	0	0	560	0	0
13	Non-saline	6.18	0.31	0.41	351	180	3250	510	rice+black gram+fallow	3.6	172	344	172	172	0	774	86	0	172	0	86	0	0	0	0	86	0	0	0	0	86	0	0
15	Non-saline	6.54	0.39	0.78	342	280	6340	3396	rice+groundnut+fallow	3.9	136	136	0	0	0	34	34	34	0	0	0	0	34	0	0	0	0	0	0	0	102	0	0
16	Non-saline	5.42	0.41	0.36	212	95	1260	396	rice+black gram+fallow	4.5	720	120	0	60	120	0	60	0	0	120	180	0	0	0	0	1440	0	0	420	60	120	0	0
17	Non-saline	5.69	0.43	0.63	308	170	3350	1530	rice+black gram+fallow	6.2	272	272	204	68	136	0	68	0	0	136	136	0	0	68	0	204	68	0	0	0	204	0	0
18	Non-saline	6.93	0.56	0.39	214	60	2250	1050	rice+black gram+fallow	5.4	0	0	108	0	0	0	54	0	0	0	0	0	0	0	0	54	0	0	0	0	0	0	0
19	Non-saline	7.07	0.57	0.9	363	300	12500	1110	rice+black gram+fallow	6	150	50	50	100	100	50	0	0	0	0	50	0	0	0	0	0	0	0	0	0	0	0	0
20	Non-saline	6.91	0.62	0.81	381	305	5000	1500	rice+black gram+fallow	5.1	0	92	46	0	0	0	0	0	0	46	92	0	0	0	0	0	0	0	0	0	0	0	0
21	Non-saline	7.01	0.79	0.36	232	490	3700	1500	rice+black gram+fallow	5.3	840	180	300	180	180	120	60	0	0	60	240	0	0	0	0	540	0	0	0	0	240	0	0
22	Non-saline	7.08	0.83	0.24	184	455	3160	1332	rice+black gram+fallow	8.7	200	0	160	0	0	0	0	0	0	0	160	0	0	0	0	0	0	0	0	0	0	0	0
23	Non-saline	6.08	0.9	0.39	274	205	1400	570	rice+black gram+fallow	2.3	700	350	350	450	100	400	100	50	0	0	200	0	50	0	0	0	0	0	0	0	850	0	0
25	Non-saline	7.29	1.15	0.33	247	320	5800	360	rice+black gram+sunhemp	4.5	144	240	336	192	144	96	0	0	0	0	192	48	48	0	0	0	0	0	0	0	48	0	0
26	Non-saline	7.29	1.19	0.57	283	1125	5800	420	rice+fallow+sesamum	7.1	250	200	0	0	400	50	0	0	0	0	50	0	0	0	0	0	0	0	0	0	100	0	0
14	saline	7.51	2.43	0.12	214	1100	13900	4170	rice+fallow	4.4	150	250	150	100	0	0	0	0	0	0	0	0	0	0	0	0	0	0	0	50	0	0	0
24	saline	7.85	4.45	0.69	298	1625	3350	1560	rice+fallow	3.5	120	0	0	0	0	80	0	0	0	0	0	0	0	0	0	0	0	0	0	80	0	0	0
27	saline	6.52	4.74	1.29	368	1600	11750	2250	rice+fallow	4.9	300	0	0	0	0	0	0	0	0	240	0	0	0	0	0	0	0	0	0	0	120	0	0
28	saline	8.24	5.86	0.09	312	1950	9800	1560	rice+fallow	6.2	324	72	216	108	180	0	0	0	0	72	36	0	0	0	108	0	0	0	0	60	0	0	0
29	saline	7.28	9.16	0.99	381	6187	9750	7080	rice+fallow	4.1	280	80	120	160	0	0	0	0	0	0	0	0	0	0	280	0	0	0	0	240	0	0	0
30	saline	7.99	12.2	0.33	268	6187	6400	3180	rice+fallow	6.7	50	50	30	0	20	0	30	0	0	0	0	20	0	0	0	0	0	0	0	20	0	0	0

## Sheet: Nematode indices
		Saline	Non-saline
Shanon-Weiner diversity index	H	2.48576	2.2095
Shanon equity index	EH	0.816471	0.779857
Margalef species richness index	d	2.66996	2.35742
Simpson's index of dominance	D	0.0435107	0.0941659

## Sheet: ecological indices 
Sites	Maturity index	Structure index	Enrichment index	Basal index
1	2.79	72.1	0	27.9
2	1.7	50	83.33	14.29
3	2.54	73.21	53.33	20.51
4	2.78	85.25	68.97	11.11
5	2.35	72.73	68.97	16.98
6	2.93	84.3	38.46	14.3
7	2.69	85.71	75	10
8	2.83	84.73	50	13.25
9	3	87.88	53.33	10.65
10	2.44	81.03	75.82	11.89
11	3.04	89.79	40	9.56
12	3.31	93.33	0	6.67
13	2.84	87.61	63.16	10.22
15	2.13	53.25	59.09	27.91
16	2.1	61.54	70.59	20
17	4	100	0	0
18	2.25	66.67	66.67	20
19	4	100	0	0
20	2.45	70.43	54.05	21.94
21	2.88	78.08	0	21.92
22	2.89	76.19	0	23.81
23	2.15	62.7	66.67	21.36
25	1.92	20	47.06	46.75
26	3	84.35	35.71	14.4
14	2.6	60.98	0	39.02
24	2.17	62.5	66.67	21.43
27	3	84.21	40	14.29
28	2.25	66.67	66.67	20
29	2.65	71.85	34.48	24.52
30	2.54	67.32	24.1	29.61

## Sheet: trophic groups
Trophic groups	number of taxa	contribution (%)
bacterial feeders	8	35
fungal feeders	2	8.6
herbivores	5	21.7
predators	6	26
omnivores	2	8.6
total taxa	23	100

## Sheet: mean ecological indices
Ecological indices	saline	non-saline
Maturity index	2.54 ± 0.299	2.71 ± 0.563
Structure index	68.9 ± 8.42	75.9 ± 17.7
Enrichment index	38.7 ± 25.7	44.6 ± 28.8
Basal index	24.8 ± 8.61	16.5 ± 9.85
